# Supplementary material
Source: publisher figshare collection journal article supplement (https://karger.figshare.com/ndownloader/files/14640485)
Supplement: Supplementary file 1 [file 14640485]

Supplementary Table 1. Current Procedural Terminology Codes of Bariatric Surgery Procedures

| CPT Code | Procedure Description |
| --- | --- |
| 43644 | Bypass operation of stomach using an endoscope |
| 43846 | Partial removal of stomach |
| 43775 | Stomach reduction procedure with partial removal of stomach using an endoscope |
| 43845 | Partial removal of stomach |
| 43770 | Insertion of adjustable stomach reduction device using an endoscope |
| 43842 | Banding of upper stomach to reduce size |
| 43843 | Reduction of size of upper stomach |
| 43848 | Reduction of upper stomach bypass, open procedure |
| 43645 | Bypass operation of stomach with reconstruction of small bowel using an endoscope |
| 43771 | Revision of stomach reduction device using an endoscope |
| 43772 | Removal of stomach reduction device using an endoscope |
| 43773 | Replacement of stomach reduction device using an endoscope |
| 43774 | Removal of stomach reduction device and port beneath the skin using an endoscope |
| 43847 | Partial removal of stomach |
